# Supplementary material for: Dot-ring nanostructure: Rigorous analysis of many-electron effects
Source: PubMed Central journal article supplement (PMC4949483; doi:10.1038/srep29887), 2016-07-19
Supplement: srep29887-s1.pdf [file srep29887-s1.pdf]

## Supplementary Information

# Dot-ring nanostructure: Rigorous analysis of many-electron effects

Andrzej Biborski<sup>1</sup>, Andrzej P. Kądziaława<sup>2</sup>, Anna Gorczyca-Goraj<sup>3</sup>, Elżbieta Zipper<sup>3</sup>, Maciej M. Mańska<sup>3</sup>, and Józef Spałek<sup>1,2</sup>

<sup>1</sup> Akademyckie Centrum Materiałów i Nanotechnologii, AGH Akademia Górniczo-Hutnicza, Al. Mickiewicza 30, Kraków, Poland

<sup>2</sup> Instytut Fizyki im. Mariana Smoluchowskiego, Uniwersytet Jagielloński, ul. Łojasiewicza 11, PL-30-348 Kraków, Poland

<sup>3</sup> Instytut Fizyki, Uniwersytet Śląski, ul. Uniwersytecka 4, PL-40-007 Katowice, Poland

## A Starting basis of single-particle wave-functions

The shapes of the ten selected single-particle real wave functions  $\varphi_{nl}(\mathbf{r})$  forming a trial basis for the definition of the field operators in (1) are characterized below in Figs. S1 and S2. The method of calculating those wave-functions relies on solving the wave equation for a single electron for the potential energy depicted in Fig. 1. The details and the method accuracy is discussed elsewhere<sup>8,17,29</sup>. With the rotational symmetry of the potential in the DRN plane, those wave functions exhibit similarity to the hydrogenic-like functions for values of  $l = 0, \pm 1, \pm 2$  respectively. This minimal basis with  $M = 10$  components in Eq. (1) is sufficient to describe accurately the multiparticle states for  $N_e = 2$  and 3 electrons analyzed in main text. A subsequent enlargement of the starting basis to  $M = 18$  functions did not influence the accuracy of the presented results.

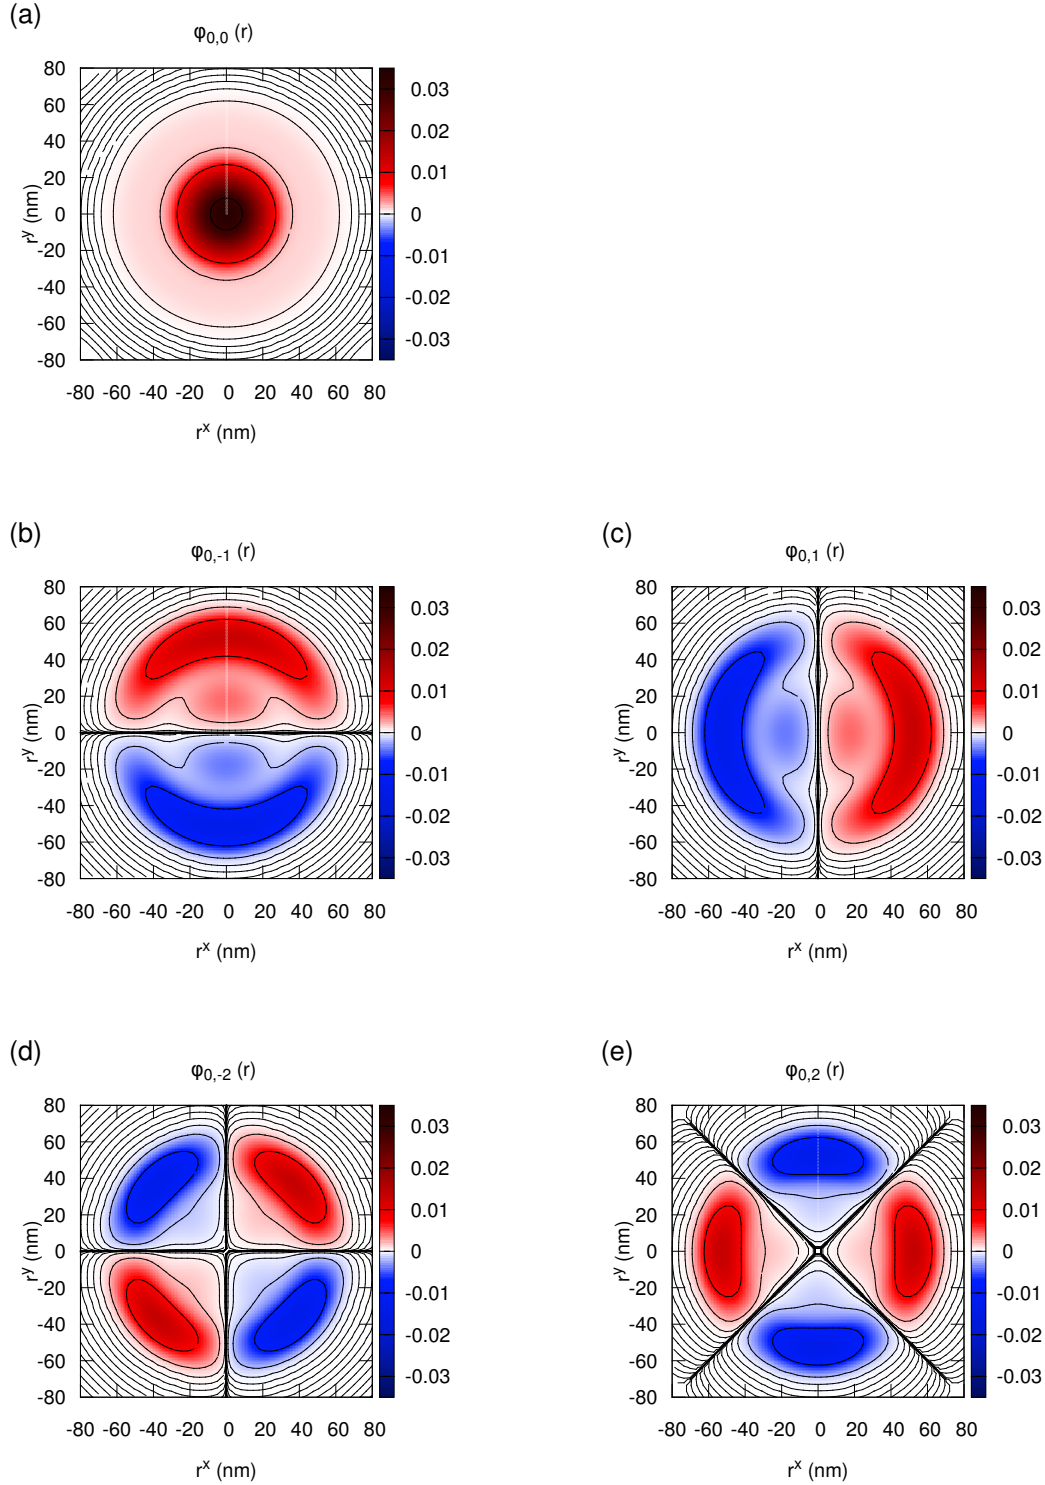

**Figure S1.** Starting single-particle wavefunctions for  $n = 0$ ,  $l = 0, \pm 1, \pm 2$  ((a) – (e)), respectively, all for the quantum dot potential  $V_{\text{QD}} = 0$ , taken to define the field operator in Eq. (1). Note their similarity to the  $s$ ,  $p_x$ ,  $p_y$ ,  $d_{xy}$  and  $d_{x^2-y^2}$  atomic states, respectively.

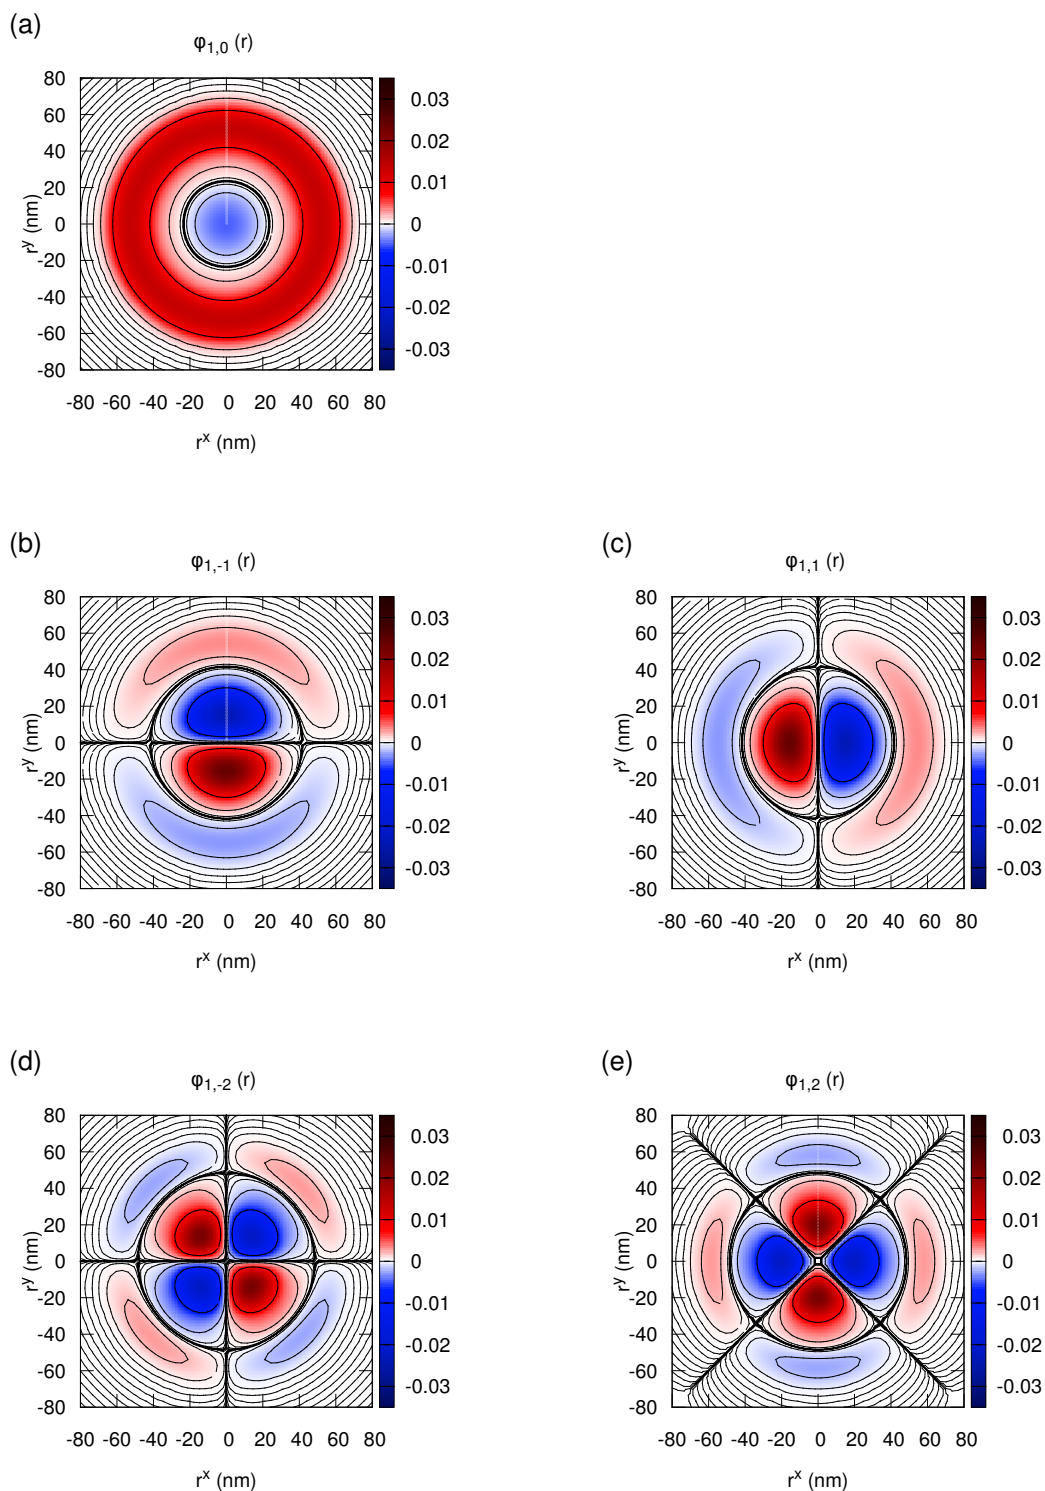

**Figure S2.** Starting single-particle wavefunctions for  $n = 1$ ,  $l = 0, \pm 1, \pm 2$  ((a) – (e)), respectively, all for the quantum dot potential  $V_{\text{QD}} = 0$ , taken together with those depicted in Fig. S1 to define the field operator (1). The subsidiary (external) maxima and minima reflect the part associated with the presence of the ring.

## B Detailed values of microscopic interaction parameters in Fock space

For the sake of completeness we provide the detailed numerical values of selected Coulomb interaction parameters as a function of the relative QD potential  $V_{\text{QD}}$ . Note that we have included also the 3- and 4-state interaction parameters, often ignored in many-particle considerations. Although the values of those last parameters are small, they are important as the corresponding number of such four-state terms (c.f. S5) is the largest and equal to 5040 (when we disregard symmetries leading to their degeneracy).

**Table S1.** All Hubbard intrastate repulsion amplitudes  $U_i \equiv V_{iiii}$  (in meV) for different QD potentials.

| $V_{\text{QD}}$ (meV) | -6   | -5   | -4   | -3   | -2   | -1   | 0    | 1    | 2    | 3    | 4    | 5    | 6    |
|-----------------------|------|------|------|------|------|------|------|------|------|------|------|------|------|
| $U_{(0\ 0)}$          | 8.67 | 8.60 | 8.59 | 8.51 | 8.55 | 8.38 | 8.33 | 8.08 | 7.15 | 2.97 | 2.90 | 2.88 | 2.92 |
| $U_{(0\ 1)}$          | 7.61 | 7.49 | 7.20 | 6.27 | 3.67 | 3.32 | 3.41 | 3.44 | 3.45 | 3.50 | 3.48 | 3.51 | 3.49 |
| $U_{(0\ \bar{1})}$    | 7.63 | 7.47 | 7.14 | 6.21 | 3.63 | 3.29 | 3.39 | 3.47 | 3.43 | 3.49 | 3.49 | 3.51 | 3.53 |
| $U_{(0\ 2)}$          | 3.19 | 3.23 | 3.28 | 3.29 | 3.28 | 3.29 | 3.28 | 3.32 | 3.28 | 3.30 | 3.27 | 3.27 | 3.26 |
| $U_{(0\ \bar{2})}$    | 3.26 | 3.24 | 3.25 | 3.27 | 3.31 | 3.26 | 3.27 | 3.30 | 3.26 | 3.32 | 3.26 | 3.29 | 3.26 |
| $U_{(1\ 0)}$          | 2.94 | 2.90 | 2.89 | 2.93 | 2.91 | 2.89 | 2.89 | 2.89 | 2.87 | 5.60 | 7.74 | 7.97 | 7.96 |
| $U_{(1\ 1)}$          | 3.47 | 3.51 | 3.40 | 3.33 | 4.25 | 6.50 | 7.02 | 7.11 | 7.15 | 7.01 | 6.89 | 6.83 | 6.64 |
| $U_{(1\ \bar{1})}$    | 3.46 | 3.46 | 3.42 | 3.28 | 4.27 | 6.50 | 6.97 | 7.12 | 7.08 | 7.02 | 6.88 | 6.83 | 6.66 |
| $U_{(1\ 2)}$          | 6.18 | 6.31 | 6.27 | 6.26 | 6.02 | 5.93 | 5.86 | 5.76 | 5.61 | 5.35 | 5.18 | 4.74 | 4.36 |
| $U_{(1\ \bar{2})}$    | 6.20 | 6.29 | 6.30 | 6.25 | 6.15 | 6.04 | 5.93 | 5.82 | 5.63 | 5.29 | 5.09 | 4.75 | 4.40 |

**Table S2.** Selected values of the interstate Coulomb repulsion amplitudes  $K_{ij} \equiv V_{ijij}$  (in meV) for different QD potentials.

| $V_{\text{QD}}$ (meV)     | -6   | -5   | -4   | -3   | -2   | -1   | 0    | 1    | 2    | 3    | 4    | 5    | 6    |
|---------------------------|------|------|------|------|------|------|------|------|------|------|------|------|------|
| $K_{(0\ 0),(0\ 1)}$       | 7.20 | 7.15 | 6.99 | 6.46 | 4.26 | 2.67 | 2.38 | 2.29 | 2.32 | 2.73 | 2.90 | 2.84 | 2.93 |
| $K_{(0\ 0),(0\ 2)}$       | 2.38 | 2.28 | 2.25 | 2.26 | 2.23 | 2.22 | 2.23 | 2.22 | 2.30 | 2.74 | 2.88 | 2.91 | 2.91 |
| $K_{(0\ 0),(1\ 0)}$       | 2.28 | 2.27 | 2.27 | 2.27 | 2.27 | 2.27 | 2.29 | 2.38 | 2.88 | 3.53 | 2.45 | 2.29 | 2.26 |
| $K_{(0\ 0),(1\ 1)}$       | 2.28 | 2.31 | 2.43 | 2.90 | 5.03 | 6.57 | 6.81 | 6.72 | 6.37 | 3.47 | 2.44 | 2.34 | 2.31 |
| $K_{(0\ 0),(1\ 2)}$       | 6.17 | 6.15 | 6.11 | 6.11 | 6.03 | 5.92 | 5.87 | 5.66 | 5.35 | 3.17 | 2.50 | 2.44 | 2.46 |
| $K_{(0\ 1),(0\ \bar{1})}$ | 5.89 | 5.84 | 5.60 | 4.90 | 2.89 | 2.35 | 2.32 | 2.34 | 2.36 | 2.35 | 2.36 | 2.33 | 2.37 |
| $K_{(0\ 2),(0\ \bar{2})}$ | 2.54 | 2.54 | 2.53 | 2.53 | 2.57 | 2.55 | 2.54 | 2.55 | 2.54 | 2.53 | 2.53 | 2.52 | 2.55 |
| $K_{(1\ 1),(1\ \bar{1})}$ | 2.33 | 2.32 | 2.35 | 2.37 | 3.41 | 5.11 | 5.47 | 5.51 | 5.47 | 5.47 | 5.35 | 5.29 | 5.14 |

**Table S3.** Selected values of the interstate exchange integral  $J_{ij} \equiv V_{ijji}$  (in meV) for different QD potentials.

| $V_{\text{QD}}$ (meV)     | -6   | -5   | -4   | -3   | -2   | -1   | 0    | 1    | 2    | 3    | 4    | 5    | 6    |
|---------------------------|------|------|------|------|------|------|------|------|------|------|------|------|------|
| $J_{(0\ 0),(0\ 1)}$       | 2.40 | 2.37 | 2.31 | 2.03 | 1.00 | 0.24 | 0.10 | 0.08 | 0.20 | 1.20 | 1.52 | 1.53 | 1.55 |
| $J_{(0\ 0),(0\ 2)}$       | 0.04 | 0.02 | 0.02 | 0.01 | 0.01 | 0.01 | 0.01 | 0.03 | 0.12 | 0.86 | 1.05 | 1.15 | 1.14 |
| $J_{(0\ 0),(1\ 0)}$       | 0.04 | 0.03 | 0.03 | 0.03 | 0.04 | 0.05 | 0.08 | 0.17 | 0.62 | 1.28 | 0.25 | 0.09 | 0.05 |
| $J_{(0\ 0),(1\ 1)}$       | 0.04 | 0.06 | 0.11 | 0.35 | 1.39 | 2.16 | 2.26 | 2.20 | 2.09 | 0.62 | 0.11 | 0.06 | 0.04 |
| $J_{(0\ 0),(1\ 2)}$       | 1.09 | 1.06 | 1.06 | 1.06 | 1.04 | 0.98 | 0.97 | 0.94 | 0.88 | 0.30 | 0.11 | 0.10 | 0.10 |
| $J_{(0\ 1),(0\ \bar{1})}$ | 0.88 | 0.87 | 0.76 | 0.66 | 0.38 | 0.48 | 0.53 | 0.55 | 0.57 | 0.56 | 0.57 | 0.58 | 0.56 |
| $J_{(0\ 2),(0\ \bar{2})}$ | 0.34 | 0.36 | 0.37 | 0.36 | 0.39 | 0.37 | 0.35 | 0.40 | 0.36 | 0.38 | 0.38 | 0.39 | 0.39 |
| $J_{(1\ 1),(1\ \bar{1})}$ | 0.57 | 0.57 | 0.53 | 0.47 | 0.43 | 0.71 | 0.80 | 0.79 | 0.80 | 0.79 | 0.77 | 0.77 | 0.73 |

**Table S4.** Selected correlated interstate hopping parameter values  $C_{ij} \equiv V_{ijjj}$  (in meV) for different QD potentials.

| $V_{\text{QD}}$ (meV)     | -6    | -5    | -4    | -3    | -2    | -1    | 0     | 1     | 2     | 3     | 4     | 5     | 6     |
|---------------------------|-------|-------|-------|-------|-------|-------|-------|-------|-------|-------|-------|-------|-------|
| $C_{(0\ 0),(0\ 1)}$       | 0.05  | -0.03 | 0.01  | -0.06 | -0.01 | -0.01 | 0.01  | 0     | 0     | -0.02 | 0     | -0.01 | 0.03  |
| $C_{(0\ 0),(0\ 2)}$       | 0     | 0.01  | 0     | 0     | 0     | 0     | 0     | 0     | -0.01 | 0.02  | 0.02  | 0.01  | 0.01  |
| $C_{(0\ 0),(1\ 0)}$       | -0.38 | -0.37 | -0.37 | -0.39 | -0.44 | -0.51 | -0.65 | -0.94 | -1.65 | -0.47 | 0.09  | 0.08  | 0.06  |
| $C_{(0\ 0),(1\ 1)}$       | 0     | -0.01 | 0     | 0     | -0.05 | 0.02  | -0.02 | 0     | 0.03  | 0     | 0     | 0     | 0     |
| $C_{(0\ 0),(1\ 2)}$       | 0.03  | 0     | -0.03 | 0.02  | -0.03 | -0.01 | -0.01 | 0.02  | 0     | -0.02 | 0     | 0.01  | -0.01 |
| $C_{(0\ 1),(0\ \bar{1})}$ | 0.03  | 0.01  | 0.01  | -0.01 | -0.01 | -0.02 | 0     | 0     | -0.01 | 0     | -0.01 | 0     | -0.01 |
| $C_{(0\ 2),(0\ \bar{2})}$ | -0.03 | 0.03  | -0.01 | 0     | 0     | 0.02  | -0.01 | -0.01 | 0     | 0.03  | -0.01 | -0.02 | -0.01 |
| $C_{(1\ 1),(1\ \bar{1})}$ | 0     | 0.02  | 0     | 0     | 0.01  | -0.03 | -0.02 | 0.04  | 0     | 0.02  | -0.02 | 0     | -0.01 |

**Table S5.** Selected three- and four-state parameters  $V_{[ijkl]}$  (in meV) for different QD potentials.

| $V_{\text{QD}}$ (meV)                         | -6    | -5    | -4    | -3    | -2    | -1    | 0     | 1     | 2     | 3     | 4     | 5     | 6     |
|-----------------------------------------------|-------|-------|-------|-------|-------|-------|-------|-------|-------|-------|-------|-------|-------|
| $V_{(0\ 0),(0\ 1),(0\ 1),(0\ 2)}$             | 0.34  | 0.27  | 0.23  | 0.23  | 0.21  | 0.15  | 0.14  | 0.19  | 0.37  | 0.97  | 1.08  | 1.10  | 1.12  |
| $V_{(0\ 0),(0\ 1),(0\ \bar{2}),(0\ \bar{1})}$ | 0.19  | 0.14  | 0.11  | 0.08  | 0.06  | 0.06  | 0.07  | 0.12  | 0.25  | 0.68  | 0.80  | 0.81  | 0.82  |
| $V_{(0\ 0),(0\ \bar{1}),(0\ 1),(0\ \bar{2})}$ | 0.35  | 0.27  | 0.23  | 0.23  | 0.21  | 0.15  | 0.15  | 0.19  | 0.37  | 0.95  | 1.06  | 1.11  | 1.09  |
| $V_{(0\ 0),(0\ 2),(0\ 2),(0\ \bar{1})}$       | 0     | 0     | 0     | 0     | 0     | 0     | 0     | 0     | 0     | 0.03  | 0.04  | -0.01 | 0.01  |
| $V_{(0\ 1),(0\ 1),(1\ 0),(0\ 0)}$             | 0.04  | 0.03  | 0.04  | 0.09  | 0.18  | 0.18  | 0.20  | 0.26  | 0.48  | 0.67  | 0.29  | 0.18  | 0.12  |
| $V_{(1\ 0),(0\ 2),(1\ \bar{1}),(0\ \bar{1})}$ | -0.16 | -0.19 | -0.24 | -0.40 | -0.57 | -0.33 | -0.23 | -0.19 | -0.19 | -0.28 | -0.27 | -0.27 | -0.28 |

## C DRN in the correlated state: 2- and 3-electrons particle density

Here we provide the characteristics of the first excited state for  $N_e = 2$  for two additional values of  $V_{\text{QD}}$ .

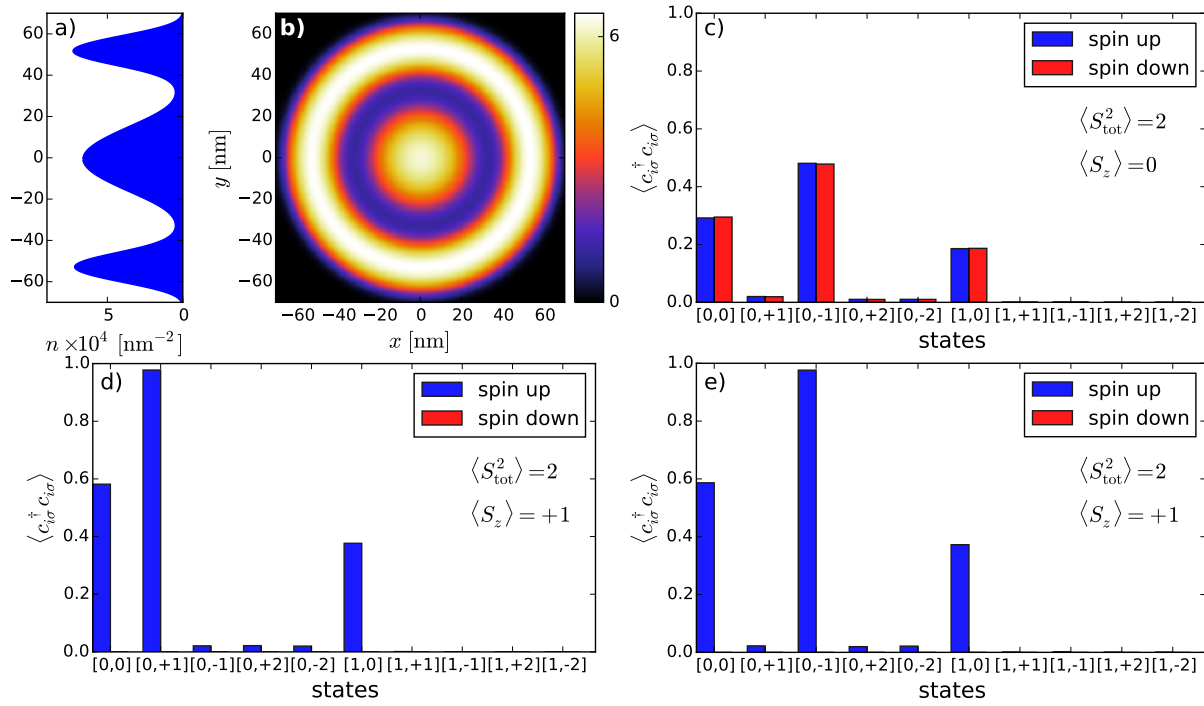

**Figure S3.** The same as in Fig. 5, but for  $V_{\text{QD}} = 2$  meV.

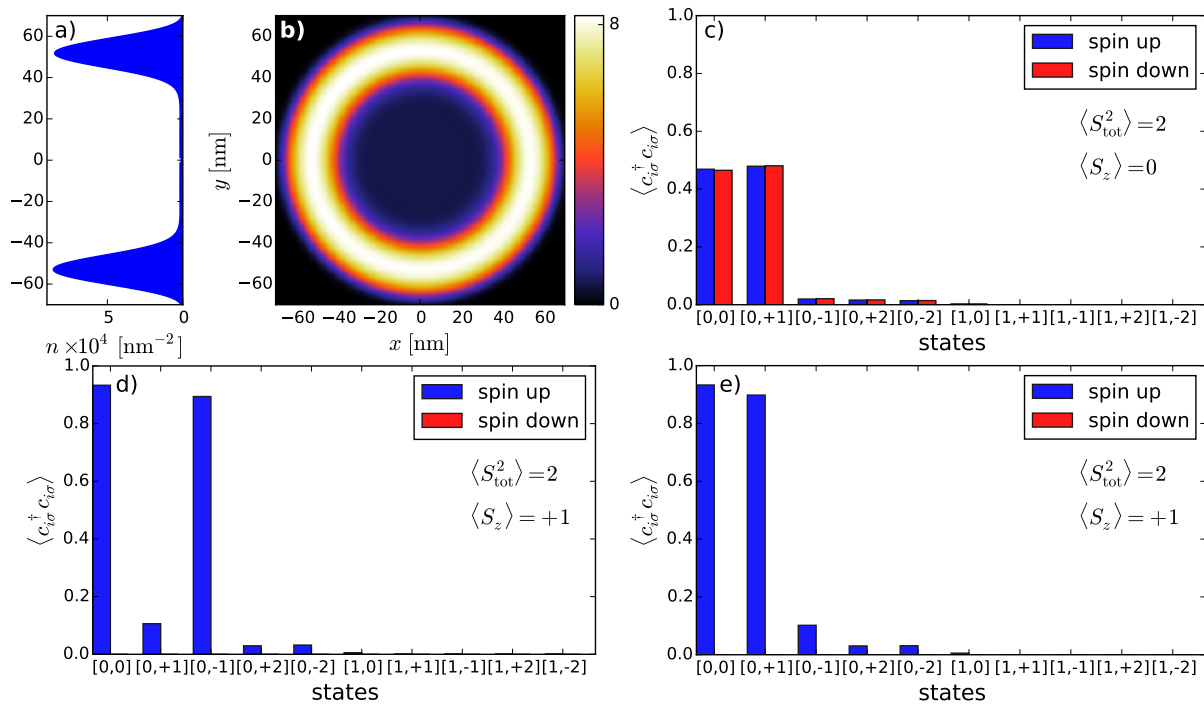

**Figure S4.** The same as in Fig. 5, but for  $V_{\text{QD}} = 4$  meV.

## D The degree of degeneracy in the ground- and first-excited state

In this Supplement we list the degeneracies of the multiparticle states. The first factor of the total degeneracy is due to the  $S_{tot}^z$  ( $2S_{tot}^z + 1$  values). The additional degeneracy represents an emergent chirality and is related to the number of ways the single-electron current can compose the total orbital current.

**Table S6.** The degrees of degeneracy for different QD potentials, with  $N_e = 2, 3$ .

| $V_{QD}$ (meV) | 2 electrons |           |              |           | 3 electrons  |           |              |           |
|----------------|-------------|-----------|--------------|-----------|--------------|-----------|--------------|-----------|
|                | deg.        | $S_{tot}$ | deg.         | $S_{tot}$ | deg.         | $S_{tot}$ | deg.         | $S_{tot}$ |
| -6             | 1           | 0         | $3 \times 2$ | 1         | $2 \times 3$ | 1/2       | $2 \times 2$ | 1/2       |
| -5             | 1           | 0         | $3 \times 2$ | 1         | $2 \times 3$ | 1/2       | $2 \times 2$ | 1/2       |
| -4             | 1           | 0         | 3            | 1         | $2 \times 3$ | 1/2       | $4 \times 2$ | 3/2       |
| -3             | 1           | 0         | 3            | 1         | $2 \times 3$ | 1/2       | $4 \times 2$ | 3/2       |
| -2             | 1           | 0         | 3            | 1         | $2 \times 3$ | 1/2       | $4 \times 2$ | 3/2       |
| -1             | 1           | 0         | 3            | 1         | $2 \times 3$ | 1/2       | $4 \times 2$ | 3/2       |
| 0              | 1           | 0         | 3            | 1         | $2 \times 3$ | 1/2       | $4 \times 2$ | 3/2       |
| 1              | 1           | 0         | 3            | 1         | $2 \times 3$ | 1/2       | $4 \times 2$ | 3/2       |
| 2              | 1           | 0         | $3 \times 2$ | 1         | 4            | 3/2       | $2 \times 2$ | 1/2       |
| 3              | 1           | 0         | $3 \times 2$ | 1         | 4            | 3/2       | $2 \times 2$ | 1/2       |
| 4              | 1           | 0         | $3 \times 2$ | 1         | 4            | 3/2       | $2 \times 2$ | 1/2       |
| 5              | 1           | 0         | $3 \times 2$ | 1         | 4            | 3/2       | $2 \times 2$ | 1/2       |
| 6              | 1           | 0         | $3 \times 2$ | 1         | 4            | 3/2       | $2 \times 2$ | 1/2       |

## E Average total momentum along the z-axis

We define the average total momentum along the z-axis as

$$\langle L^z \rangle \equiv \sum_{\sigma} \left\langle \Phi \left| \int d^3r \hat{\Psi}_{\sigma}^{\dagger}(\mathbf{r}) \hat{L}^z \hat{\Psi}_{\sigma}(\mathbf{r}) \right| \Phi \right\rangle = \sum_{\sigma, i, j} \int d^3r \varphi_{i\sigma}^* \hat{L}^z \varphi_{j\sigma} \langle \hat{c}_{i\sigma}^{\dagger} \hat{c}_{j\sigma} \rangle, \quad (\text{S1})$$

where  $|\Phi\rangle$  is the state in the Fock space,  $\hat{\Psi}_{\sigma}(\mathbf{r})$  is the field operator (1),  $\{\varphi_i\}$  is the single-particle wave-function basis,  $i$  and  $j$  are the pairs of quantum numbers  $[n, l]$  defining the single-particle state, and

$$\hat{L}^z \equiv -i\hbar \partial_{\phi} \quad (\text{S2})$$

is the single-particle  $z$ -component momentum operator. To calculate (S1) we must calculate how (S2) influences the single-particle wave-function basis  $\{\varphi_i\}$ . First, let us consider (S2) acting on the simpler single-particle wave-function basis  $\{\psi_i\}$

$$\hat{L}^z \psi_{nl}(\mathbf{r}) \equiv -i\hbar \partial_{\phi} \psi_{nl}(\mathbf{r}) = -i\hbar \partial_{\phi} R_{nl}(r) e^{il\phi} = \hbar l \psi_{nl}(\mathbf{r}). \quad (\text{S3})$$

Now,  $\hat{L}^z$  acting  $\{\varphi_i\}$  comes down to three cases

$$l = 0: \quad -i\hbar \partial_{\phi} \varphi_{n0}(\mathbf{r}) = -i\hbar \partial_{\phi} \psi_{n0}(\mathbf{r}) = 0, \quad (\text{S4a})$$

$$l > 0: \quad -i\hbar \partial_{\phi} \varphi_{nl}(\mathbf{r}) = -i\hbar \partial_{\phi} \frac{\psi_{nl}(\mathbf{r}) + \psi_{n\bar{l}}(\mathbf{r})}{\sqrt{2}} = i\hbar l \frac{\psi_{nl}(\mathbf{r}) - \psi_{n\bar{l}}(\mathbf{r})}{\sqrt{2}i} = i\hbar l \varphi_{n\bar{l}}(\mathbf{r}), \quad (\text{S4b})$$

$$l < 0: \quad -i\hbar \partial_{\phi} \varphi_{nl}(\mathbf{r}) = -i\hbar \partial_{\phi} \frac{\psi_{n\bar{l}}(\mathbf{r}) - \psi_{nl}(\mathbf{r})}{\sqrt{2}i} = i\hbar l \frac{\psi_{n\bar{l}}(\mathbf{r}) + \psi_{nl}(\mathbf{r})}{\sqrt{2}} = i\hbar l \varphi_{n\bar{l}}(\mathbf{r}). \quad (\text{S4c})$$

Eventually, due to the orthogonality of basis  $\{\varphi_i\}$  the only non-zero elements in the sum (S1) are

$$\langle L^z \rangle = \sum_{\sigma, n, l > 0} i\hbar l \left( \langle \hat{c}_{nl}^{\dagger} \hat{c}_{nl} \rangle - \langle \hat{c}_{n\bar{l}}^{\dagger} \hat{c}_{n\bar{l}} \rangle \right). \quad (\text{S5})$$

It means that as long as the symmetry condition  $\langle \hat{c}_{nl}^{\dagger} \hat{c}_{nl} \rangle = \langle \hat{c}_{n\bar{l}}^{\dagger} \hat{c}_{n\bar{l}} \rangle$  is fulfilled (which is the case here), the average total momentum along  $z$ -axis will be equal to zero.
